# Supplementary material for: Identification of Black Reef Shipwreck Sites Using AI and Satellite Multispectral Imagery
Source: MDPI journal article supplement (doi:10.3390/rs15082030), 2023-04-11
Supplement: s1 [file s1]

# Supplementary Material

## Identification of Black Reef Shipwreck Sites Using AI and Satellite Multispectral Imagery

Alexandra Karamitrou <sup>1,\*</sup>, Fraser Sturt <sup>1</sup> and Petros Bogiatzis <sup>2</sup>

List of all known shipwrecks that have developed a discoloration in their surrounding environment developing a “black reef” (Table S1). We have available imagery only for the ones that were used in this study while for the rest there is bibliography that indicates their existence.

*Table S1: List of all known shipwrecks that have developed a discoloration in their surrounding environment developing a “black reef”.*

| Reef       | Number of shipwrecks | Coordinates (WGS84)                                                                                                                                                                                                                  |
|------------|----------------------|--------------------------------------------------------------------------------------------------------------------------------------------------------------------------------------------------------------------------------------|
| Canton     | 1                    | -2.814997, -171.7151                                                                                                                                                                                                                 |
| Nikumamoro | 1                    | -4.6608, -174.5450                                                                                                                                                                                                                   |
| Kingmans   | 1                    | 6.4049 -162.351339                                                                                                                                                                                                                   |
| Kenn       | 11                   | <b>Used for training</b><br>1. -21.257019, 155.780382<br>2. -21.254144, 155.780249<br>3. -21.256865, 155.785203<br>4. -21.253460, 155.792848                                                                                         |
|            |                      | <b>Used for testing</b><br>5. -21.266294, 155.751474<br>6. -21.261727, 155.765001<br>7. -21.260455, 155.763734<br>8. -21.260200, 155.766308<br>9. -21.258671, 155.770358<br>10. -21.256630, 155.768815<br>11. -21.258416, 155.771783 |
| Rose       | 1                    | <b>Used for testing</b><br>-14.549244 -168.166467                                                                                                                                                                                    |
| Palmyra    |                      | 5.8773 -162.1188                                                                                                                                                                                                                     |
| Myrmidon   |                      | -18.265867 147.385947                                                                                                                                                                                                                |

|                        |  |                                                                |
|------------------------|--|----------------------------------------------------------------|
| <b>Millennium</b>      |  | –10.0028, –150.221170                                          |
| <b>Tabuaeran</b>       |  | 3.9096, –159.3845 plane wreck<br>3.857900, –159.3585 shipwreck |
| <b>McKean</b>          |  | –3.595437, –174.123249                                         |
| <b>Enderbury</b>       |  | –3.130241, –171.084144<br>Only small iron objects              |
| <b>Jarvis</b>          |  | –0.3741, –159.99<br>Only small iron objects                    |
| <b>Starbuck</b>        |  | –5.6428, –155.8838                                             |
| <b>Rawaki</b>          |  | –3.7207, –170.7117                                             |
| <b>Carondelet reef</b> |  | –5.5669, –173.8484<br>Shipwreck debris                         |

The figures below show the Kenn (Figure S1) and Kingman (Figure S2) reef respectively and a zoomed part indicating the location of black reefs in their surrounding environment. In both cases the wrecks are not visible, however, we can confirm their presence by the development of this discoloration.

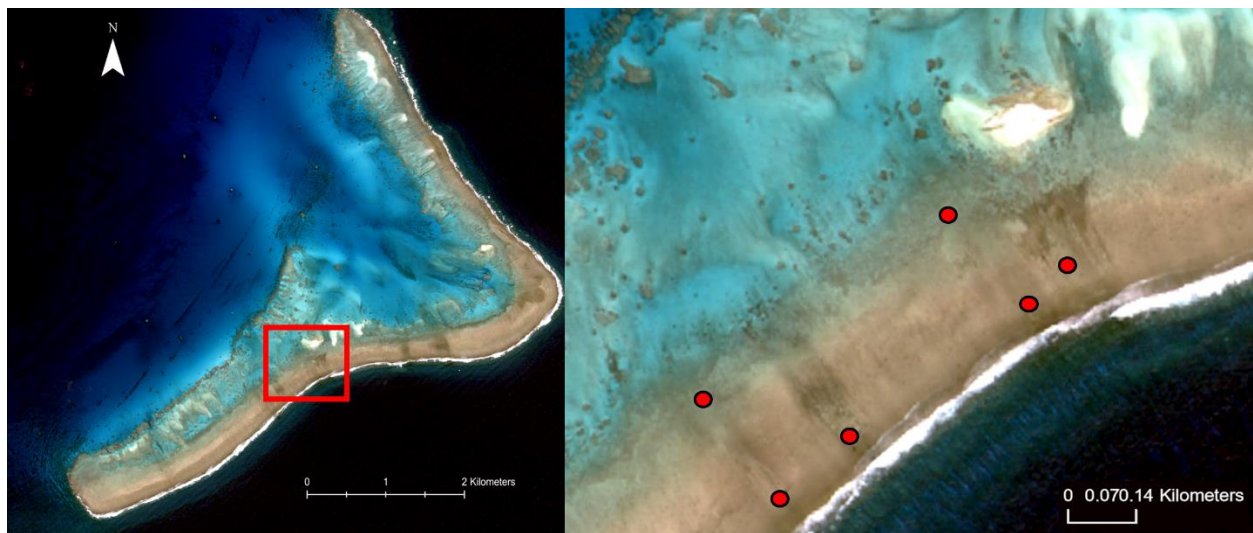

Figure S1: The left image shows the Kenn reef (Vision-1) and right image is the zoomed part included in the red rectangle of the left image. The red dots indicate the location of the shipwrecks.

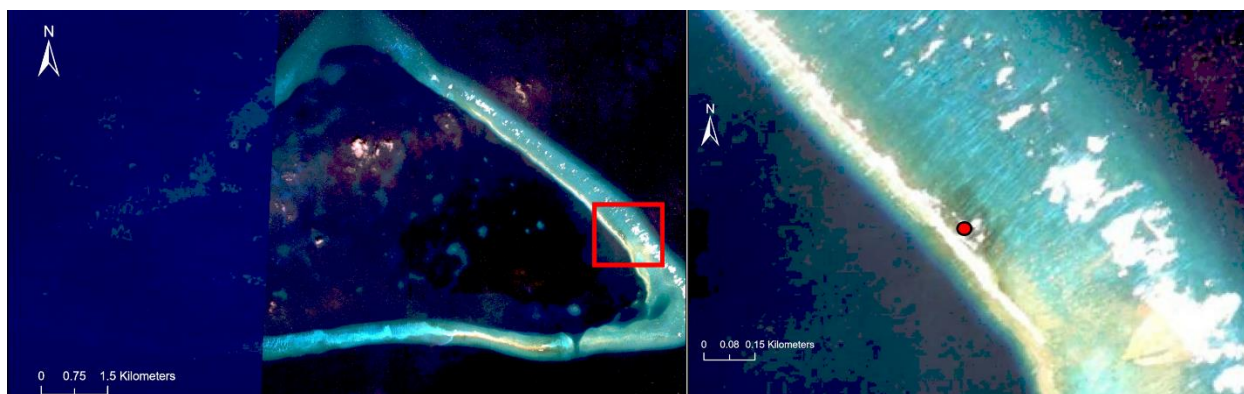

Figure S2: The left image shows the Kingman reef (Google Earth imagery, 2013) and the right image is the zoomed part included in the red rectangle of the left image. The red dot indicates the location of the shipwreck.

## References

- Barott, K.L.; Caselle, J.E.; Dinsdale, E.A.; Friedlander, A.M.; Maragos, J.E.; Obura, D.; Rohwer, F.L.; Sandin, S.A.; Smith, J.E.; Zgliczynski, B. The Lagoon at Caroline/Millennium Atoll, Republic of Kiribati: Natural History of a Nearly Pristine Ecosystem. *PLoS One* 2010, 5, doi:10.1371/journal.pone.0010950.
- Bouwman, H.; Evans, S.W.; Cole, N.; Choong Kwet Yive, N.S.; Kylin, H. The Flip-or-Flop Boutique: Marine Debris on the Shores of St Brandon's Rock, an Isolated Tropical Atoll in the Indian Ocean. *Mar. Environ. Res.* 2016, 114, doi:10.1016/j.marenvres.2015.12.013.
- Evans, S.W.; Cole, N.; Kylin, H.; Choong Kwet Yive, N.S.; Tatayah, V.; Merven, J.; Bouwman, H. Protection of Marine Birds and Turtles at St Brandon's Rock, Indian Ocean, Requires Conservation of the Entire Atoll. *African J. Mar. Sci.* 2016, 38, doi:10.2989/1814232X.2016.1198720.
- Kelly, L. W., Barott, K. I., Dinsdale, E., Friedlander, A. M., Nosrat, B., Obura, D., Sala, E., Sandin, S. A., Smith, J. E., Vermeij, M. J., Williams, G. J., Willner, D., and Rohwer, F. (2012). Black reefs: iron-induced phase shifts on coral reefs. *The ISME Journal* 6, 638–649. doi:10.1038/ISMEJ.2011.114
- Mangubhai S. and Obura D., 2018. Silent killer: Black reefs in the Phoenix Islands Protected Area. *Pacific Conservation Biology*. 25. 10.1071/PC18048.
- Maragos, J.E. Reef and Coral Observations on the Impact of the Grounding of the Longliner Jin Shiang Fa at Rose Atoll, American Samoa; 1994;
- Obura, D. O., and Mangubhai, S. (2011). Coral mortality associated with thermal fluctuations in the Phoenix Islands, 2002–2005. *Coral Reefs* 30, 607–619. doi:10.1007/S00338-011-0741-7

Obura, D. O., Stone, G., Mangubhai, S., Bailey, S., Yoshinaga, A., and Barrel, R. (2011). Baseline marine biological surveys of the Phoenix Islands, July 2000. *Atoll Research Bulletin* 589, 1–61. doi:10.5479/SI.00775630.589.1

Schroeder, R. E., Green, A. L., DeMartini, E. E., and Kenyon, J. C. (2008). Long-term effects of a ship-grounding on coral reef fish assemblages at Rose Atoll, American Samoa. *Bulletin of Marine Science* 82, 345–364.

van der Schyff, V.; du Preez, M.; Blom, K.; Kylin, H.; Kwet Yive, N.S.C.; Merven, J.; Raffin, J.; Bouwman, H. Impacts of a Shallow Shipwreck on a Coral Reef: A Case Study from St. Brandon's Atoll, Mauritius, Indian Ocean. *Mar. Environ. Res.* 2020, 156, doi:10.1016/j.marenvres.2020.104916.
